# Supplementary material for: Large-scale genome sequencing redefines the genetic footprints of high-altitude adaptation in Tibetans
Source: Springer Nature journal article supplement (doi:10.1186/s13059-023-02912-1), 2023-04-13
Supplement: MOESM2 [file 13059_2023_2912_MOESM2_ESM.pdf]

# **Large-scale genome sequencing relocates the genetic footprints of high-altitude adaptation in Tibetans**

Wangshan Zheng<sup>1,5\*</sup>, Yaoxi He<sup>1\*</sup>, Yongbo Guo<sup>1,5\*</sup>, Tian Yue<sup>1,5\*</sup>, Hui Zhang<sup>1,5\*</sup>, Jun Li<sup>2\*</sup>, Jingxin Cao<sup>2</sup>, Caijuan Bai<sup>6</sup>, Bin Wang<sup>2</sup>, Bin Zhou<sup>1,5</sup>, Xuerui Zeng<sup>1,5</sup>, Liya Li<sup>1</sup>, Li Chen<sup>2</sup>, Chunxia Li<sup>2</sup>, Hongyan Li<sup>2</sup>, Baimakangzhuo<sup>3</sup>, Chaoying Cui<sup>3</sup>, Xuebin Qi<sup>1#</sup>, Ouzhuluobu<sup>2,3#</sup>, Bing Su<sup>1,4#</sup>

<sup>1</sup>State Key Laboratory of Genetic Resources and Evolution, Kunming Institute of Zoology, Chinese Academy of Sciences, Kunming 650223, China;

<sup>2</sup>Fukang Obstetrics, Gynecology and Children Branch Hospital, Tibetan Fukang Hospital, Lhasa 850000, China;

<sup>3</sup>High Altitude Medical Research Center, School of Medicine, Tibetan University, Lhasa 850000, China;

<sup>4</sup>Center for Excellence in Animal Evolution and Genetics, Chinese Academy of Sciences, Kunming 650223, China;

<sup>5</sup>Kunming College of Life Science, University of Chinese Academy of Sciences, Beijing 100101, China;

<sup>6</sup>People's Hospital of Gansu Province, Lanzhou 730000, China

\*These authors contributed equally to this work.

#Corresponding authors: Bing Su, Ouzhuluobu or Xuebin Qi

Email: [sub@mail.kiz.ac.cn](mailto:sub@mail.kiz.ac.cn), [tbciyang@163.com](mailto:tbciyang@163.com), [qixuebin1973@163.com](mailto:qixuebin1973@163.com).

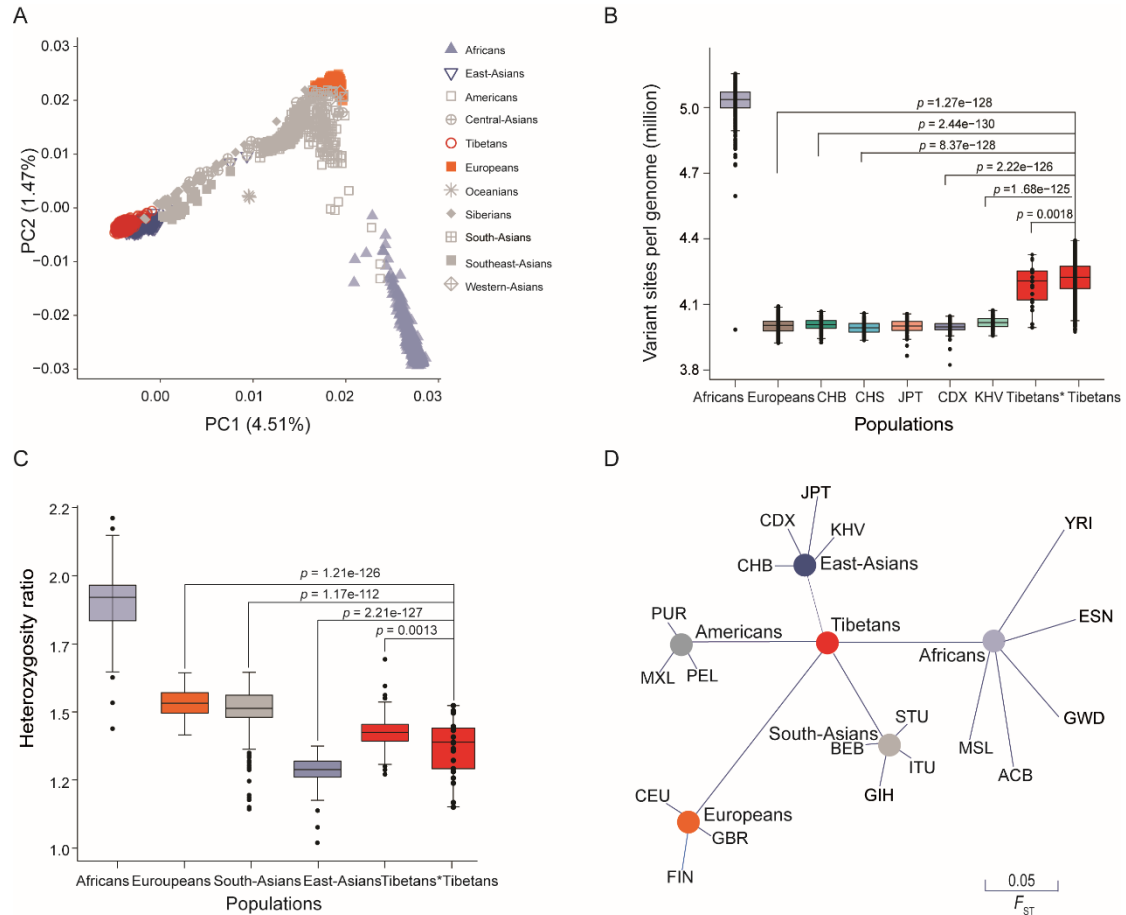

**Fig. S1 Genetic architecture of Tibetans based on the 1,001 WGS data.** **A.** Genome-wide PCA plot of the 1,001 Tibetans and global populations. **B.** Estimation of variant sites versus reference genome in Tibetans and representative global populations. **C.** Comparison of heterozygosity ratios among Tibetans and other populations. **D.** Genetic divergence (estimated by pairwise  $F_{ST}$ ) between the Tibetan populations and world-wide populations. Tibetan: the 1,001 Tibetans in this study; Tibetan\*: the 33 Tibetans from the previous study (Deng et al. 2019).

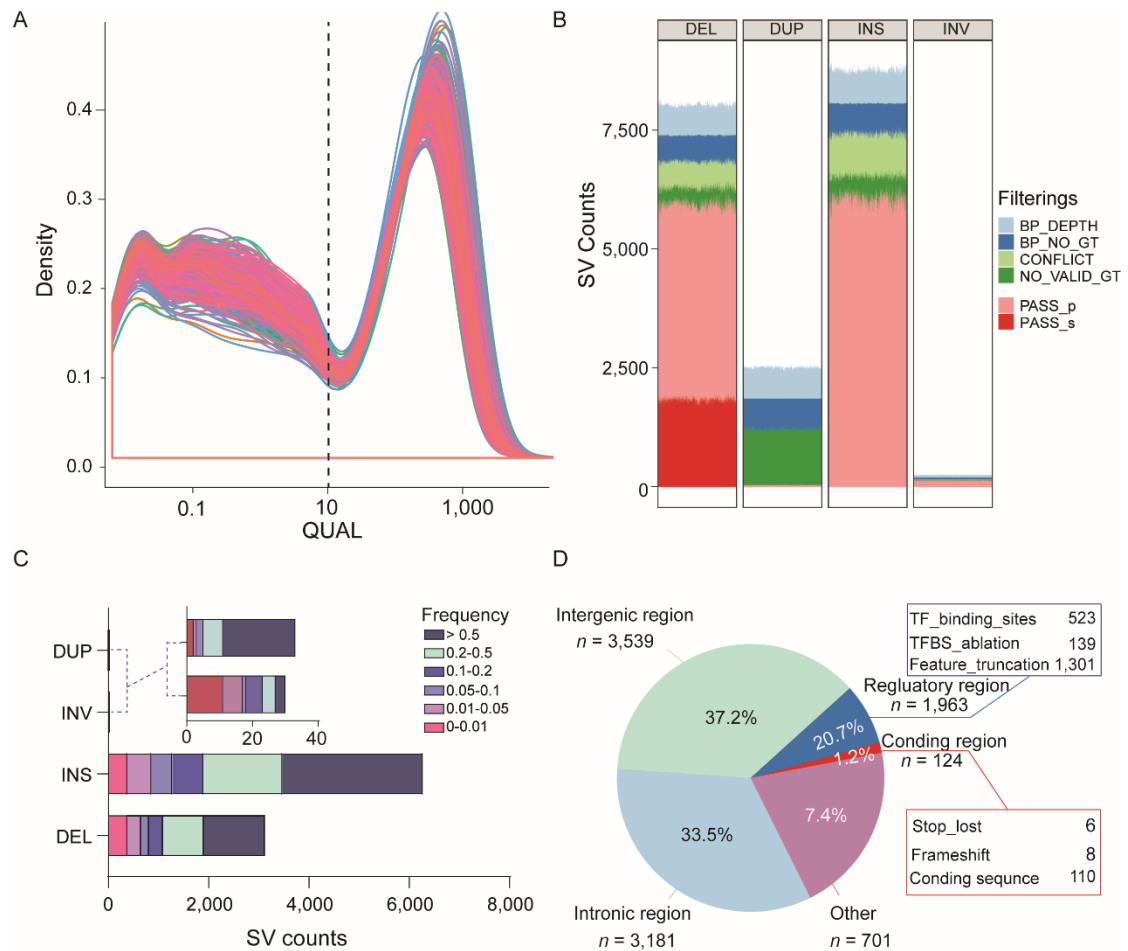

**Fig. S2 Tibetan SV analysis based on the 1,001 WGS data.** **A.** Distribution of SV quality (QUAL) by SVTyper. QC of SVTyper was conducted by QUAL > 10 (dashed line). **B.** SV counts from various filters by Paragraph and SVTyper. The SV numbers passing QC by Paragraph and SVType are denoted as PASS\_p and PASS\_s, respectively. **C.** The SV frequency spectrum of all identified SVs. **D.** Functional annotations of the 9,508 SVs.

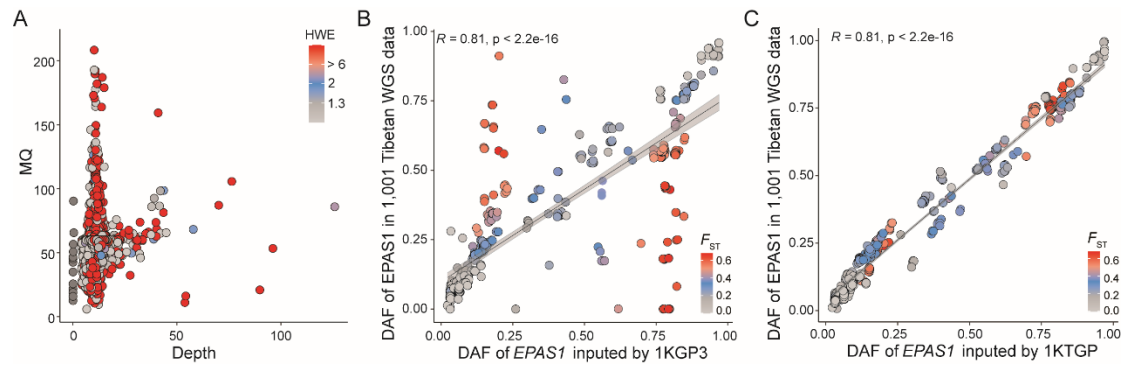

**Fig. S3 Evaluation of HWE and imputation efficiency using 1KTGP.** **A.** Correlation between depth and MQ (mapping quality) of the whole-genome SNVs underlying different HWE deviations in the 1,001 Tibetans. The pattern reveals that those SNVs with extra-deviation of HWE have good quality with high MQ and depth. **B.** The correlation of DAF of the *EPAS1* SNVs from the 1,001 Tibetan WGS data and from the 3,008 Tibetan array data imputed by 1KGP3. **C.** The correlation of DAF of the *EPAS1* SNVs from the 1,001 Tibetan WGS data and from the 3,008 Tibetan array data imputed by 1KTGP.

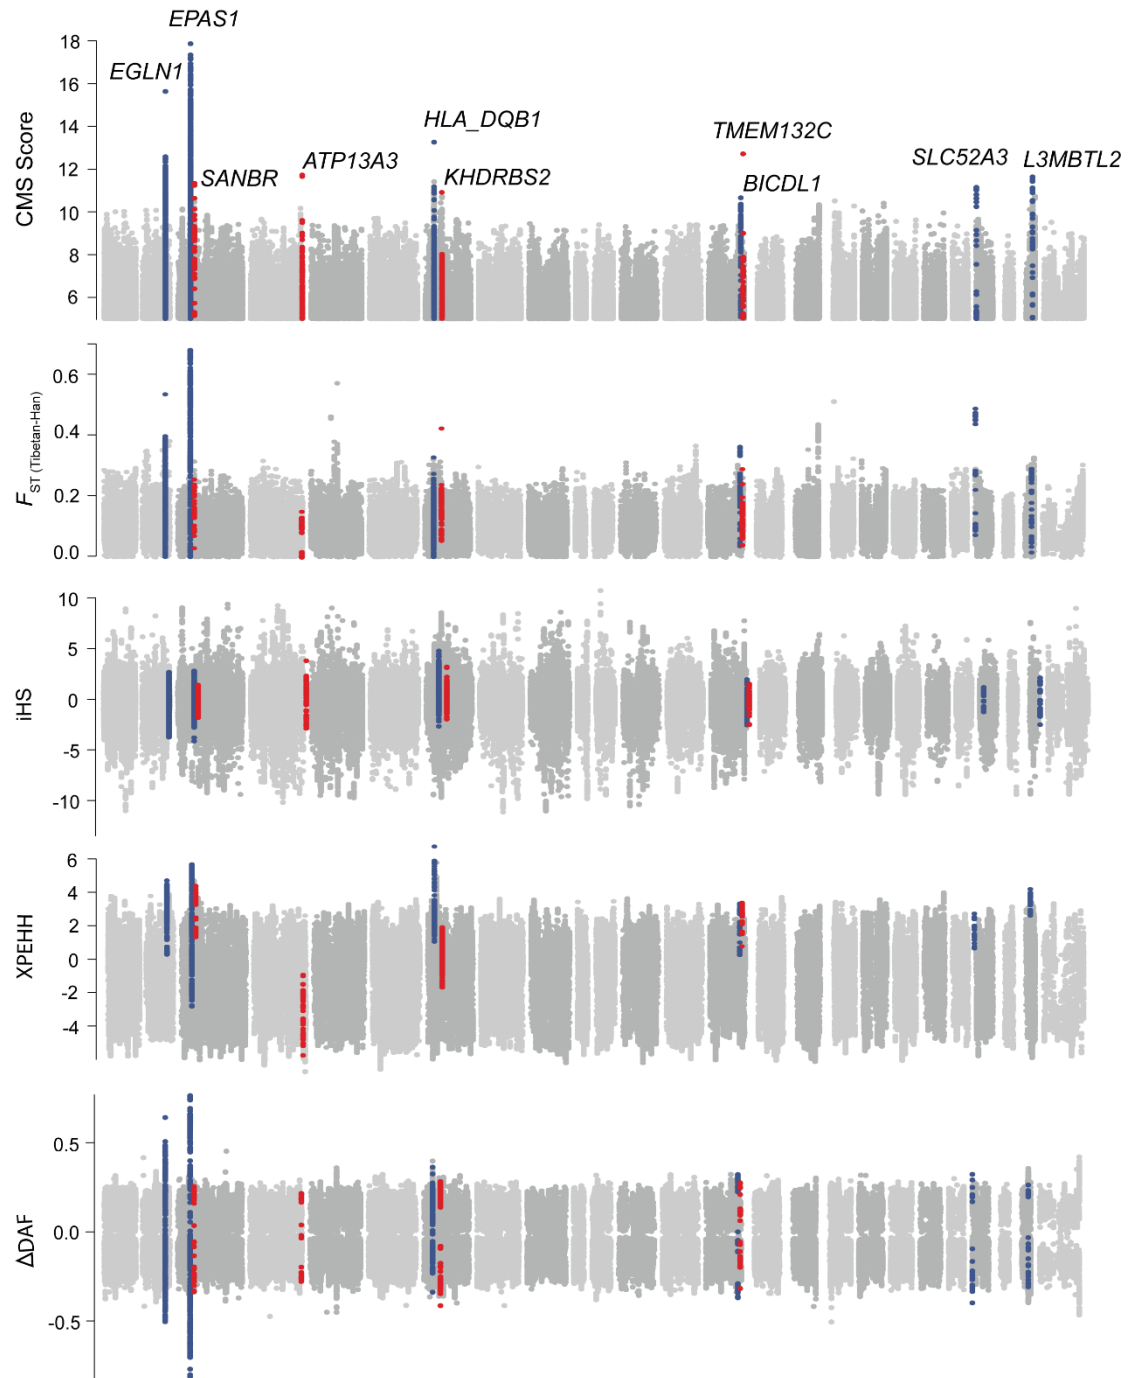

**Fig. S4 Genomic signatures of positive selection in Tibetans.** The distribution of the top 10 TSNGs in Tibetans were marked in red (newly-identified genes) and blue (reported genes) dots.

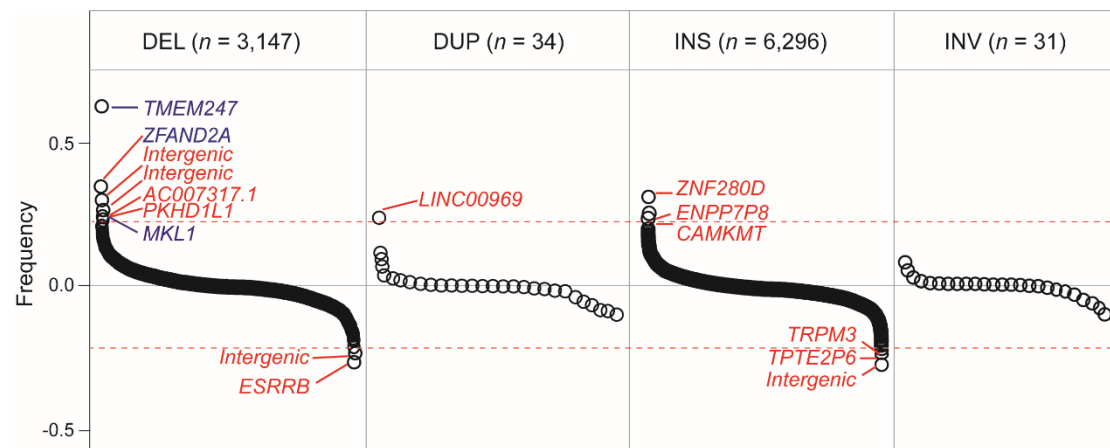

**Fig. S5 Distributions of frequency difference of the 9,508 SVs between Tibetans and other populations (lowlanders).** The newly identified Tibetans-enriched SVs (TESVs) in this study and the previously reported TESVs were marked in red and blue, respectively.

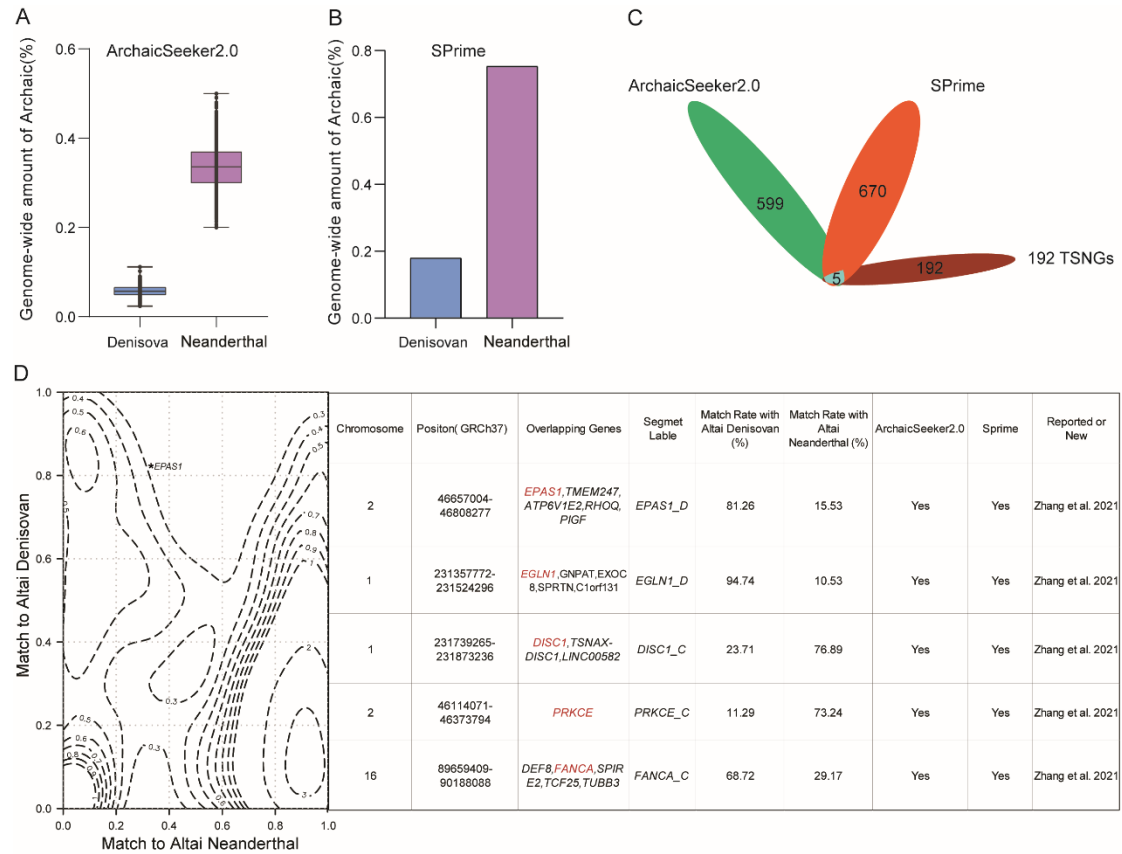

**Fig. S6** The results of archaic introgression in Tibetans. **A.** The ratios of Denisovan and Neanderthal introgression ratios in Tibetans by ArchaicSeeker 2.0; **B.** The ratios of Denisovan and Neanderthal introgression ratios in Tibetans by SPrime. **C.** The Venn diagram showing the identified introgression regions in the Tibetan genomes, detected by two commonly use tools, and their overlaps with the 192 TSNGs. Only 5 positively selected genes show archaic introgression; **D.** The genome-wide match rates with the archaic hominins. The plot shows the putatively archaic introgression in *EPAS1* and the density distribution of the match rate to Denisovans or Neanderthals, inferred by the SPrime program using Africans (YRI) as the outgroup (left panel). The 5 introgression regions overlapped with the positively selected genes (right panel), and the labels of the segments (with “-U/C/D”) correspond to upstream, core and downstream of the gene regions.

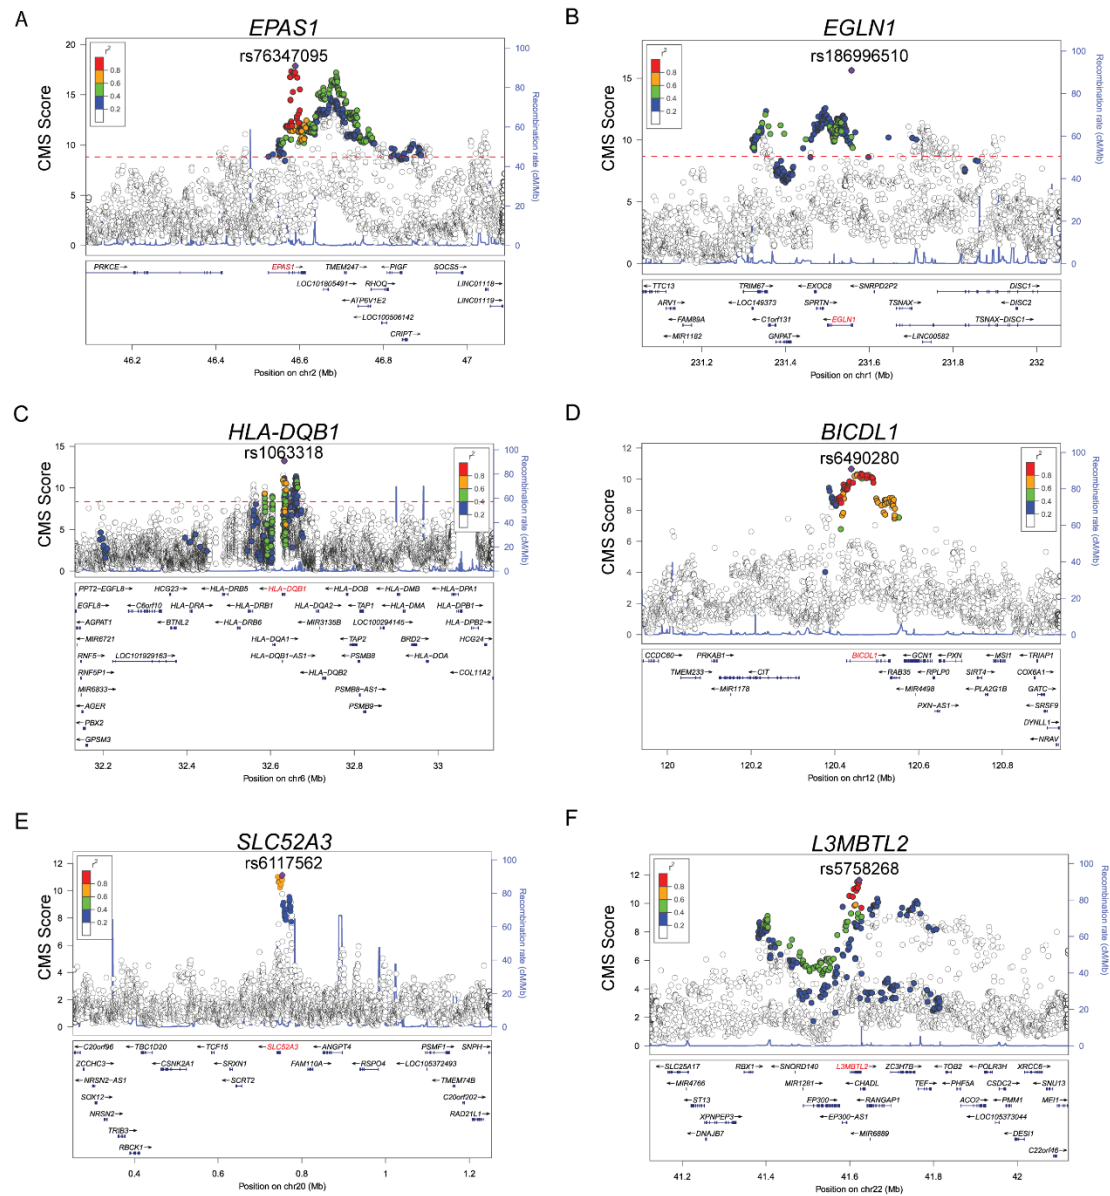

**Fig. S7 Regional plots of the CMS scores and recombination rates of six TSNGs in the top 10 list with previously reported selective signals. (A-F): *EPAS1*, *EGLN1*, *HLA-DQB1*, *BICDL1*, *SLC52A3* and *L3MBTL2*. The SNV ID and the  $p$  values of the most significant peak SNVs are labeled. The LD (measured by  $r^2$ ) between the peak SNV and the other SNVs were estimated using the 1KGTP haplotypes, and coded in colors.**



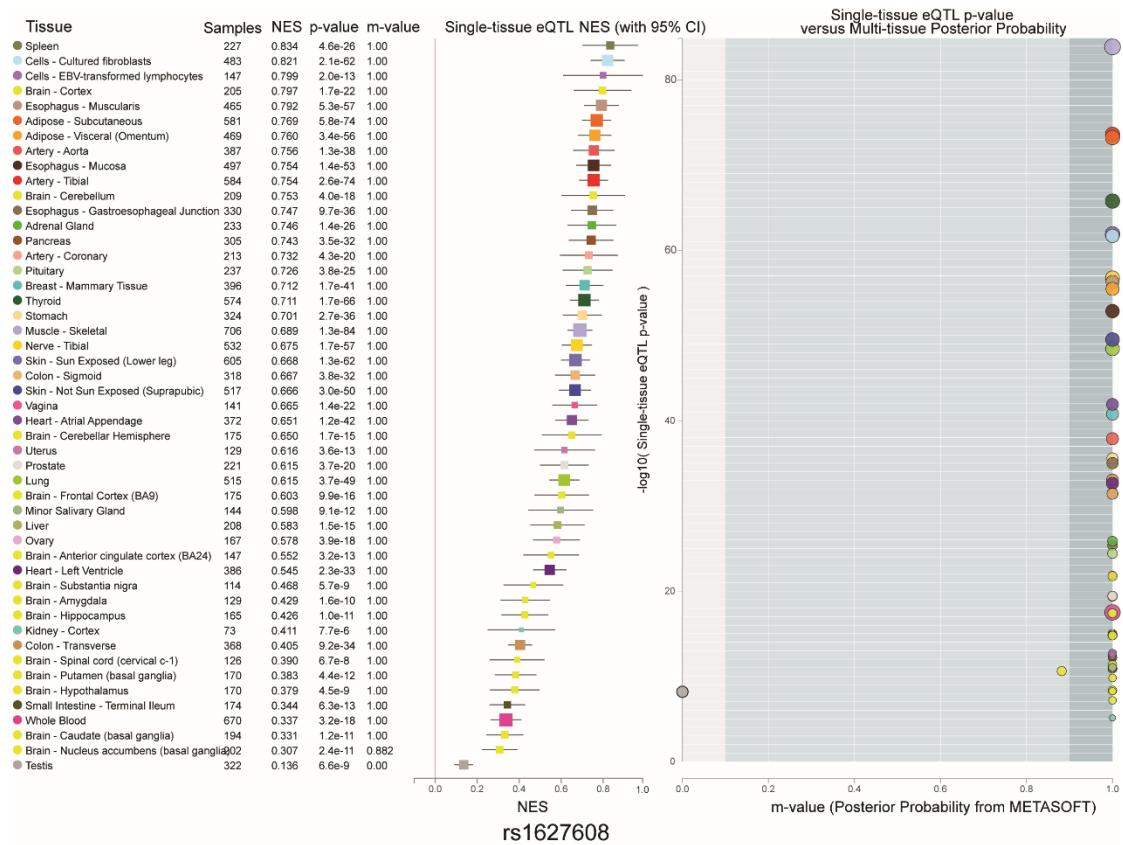

**Fig. S8** The eQTL map of the top TSNSs rs1627608 in *SANBR* based on the GTEx database.

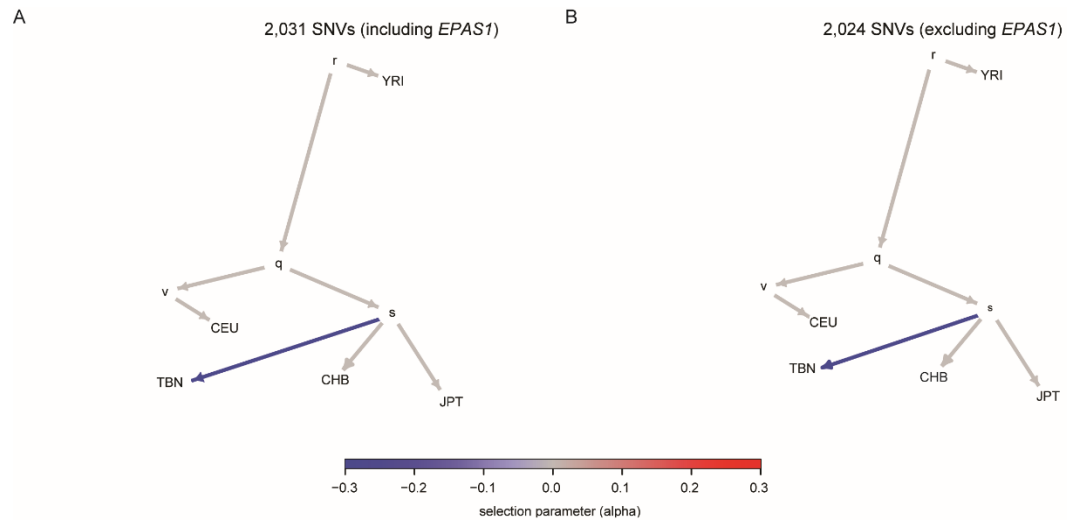

**Fig S9.** The PloyGraph diagrams of the trait-associated variants that show patterns of polygenic selection on the HGB level in Tibetans. **A.** The diagram for all the trait-associated variants (2,031 SNVs, including *EPAS1*); **B.** The diagram of the trait-associated variants by excluding the *EPAS1* variants (2,024 SNVs).

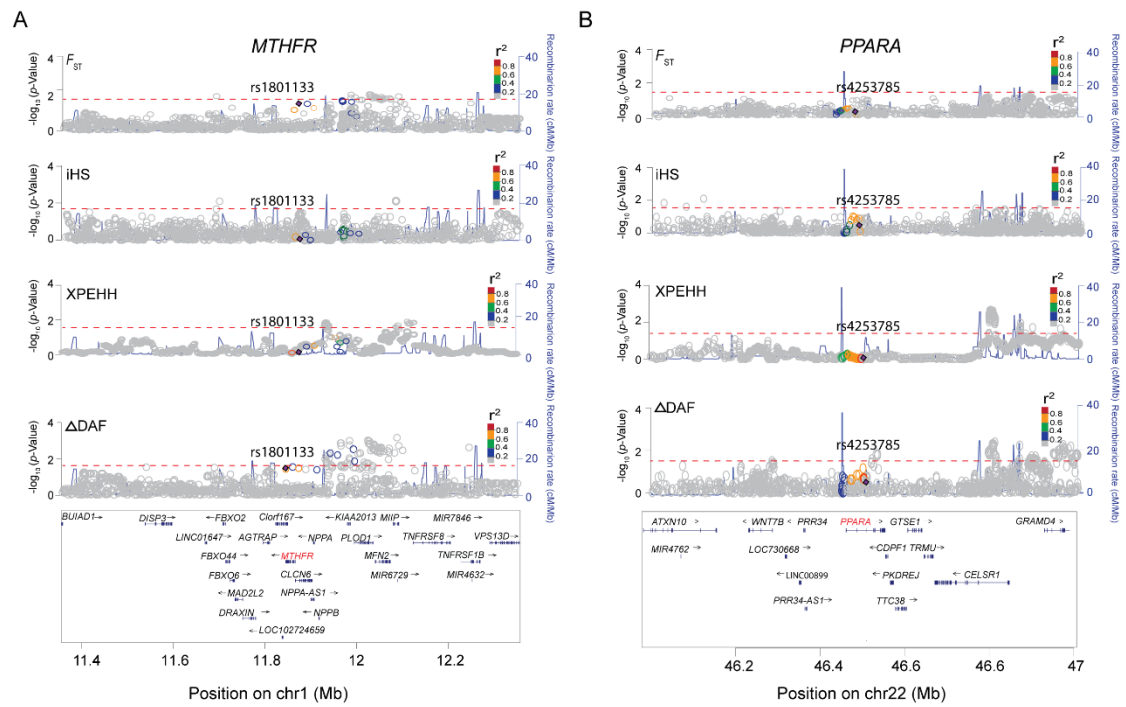

**Fig. S10** Natural selection test of *MTHFR* (A) and *PPARG* (B). No significant positive selection signals in these two genomic regions are detected.

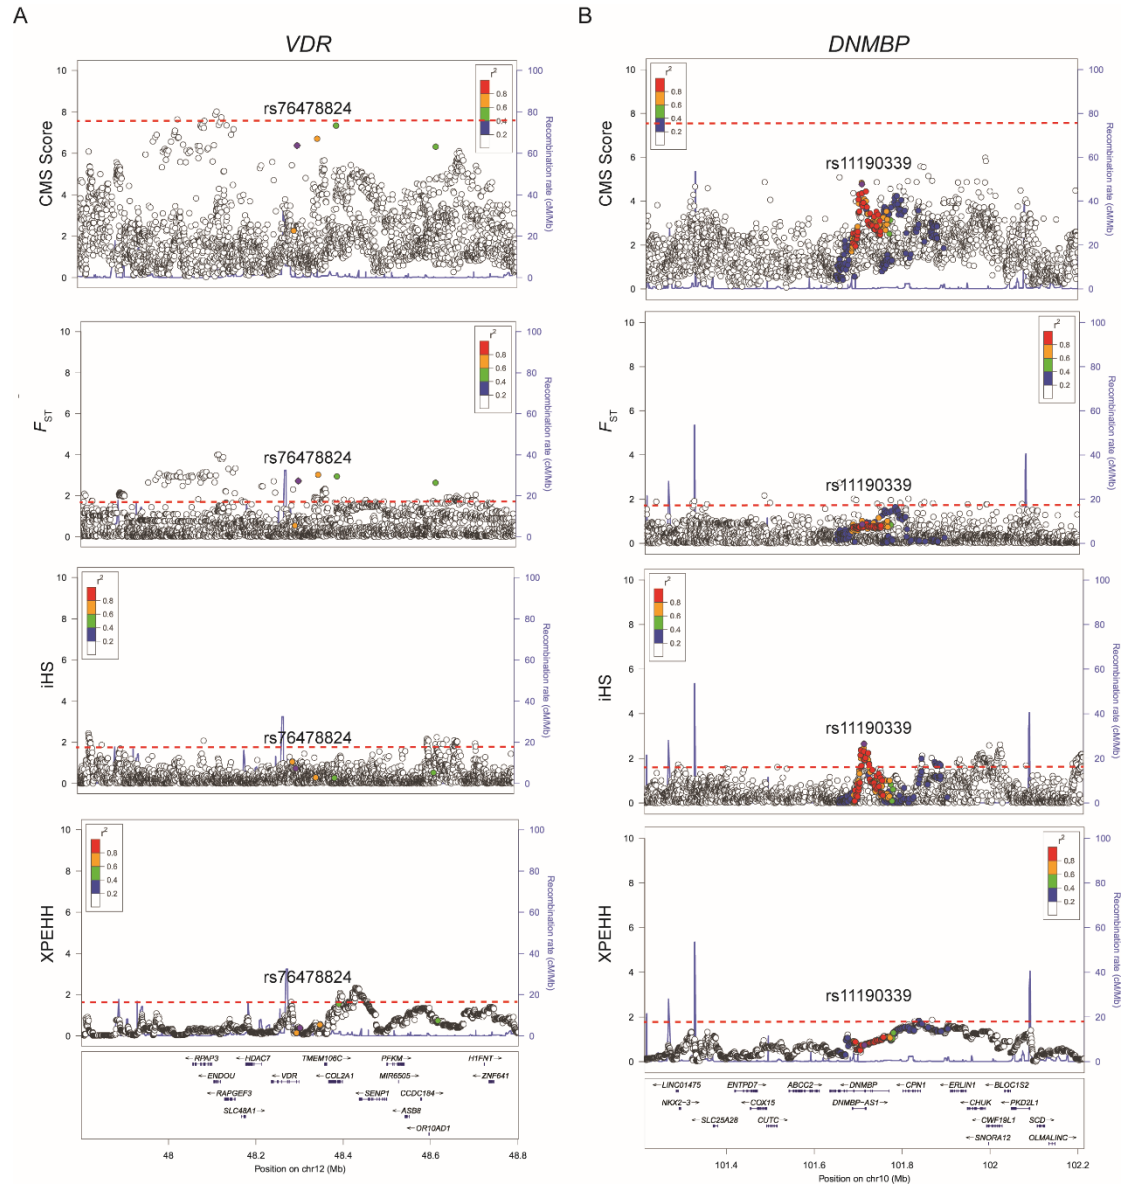

**Fig. S11** Natural selection test of the two previously reported TSNGs: *VDR* (A) and *DNMBP* (B). The significant thresholds for each statistic are marked in red dashed lines.
